# Supplementary material for: Surveillance Program of Clinical Samples for Polio and Non-Polio Enteroviruses in the Slovak Republic during the 1958–2020 Period
Source: MDPI journal article supplement (doi:10.3390/v14091957), 2022-09-03
Supplement: s1 [file s1]

# Supplementary Table S1

## Polio vaccination program in Slovakia for the period 1957-2020

| Vaccination         | Years             | Vaccination against polio                                                                                    |
|---------------------|-------------------|--------------------------------------------------------------------------------------------------------------|
| Basic vaccination   | 1957-1959         | IPV*: Salk inactivated vaccine                                                                               |
|                     | 1960-2004         | OPV**: Sabin live attenuated vaccination campaigns (March-May), children after 10 weeks of life up to 1 year |
|                     | 2005 – till today | IPV: Salk inactivated vaccination 3 doses, at 3, 5, and 11. months of age                                    |
| First Booster dose  | 1960-2005         | OPV: Sabin live attenuated vaccine campaigns continue from March to May                                      |
|                     | 2006 - till today | IPV: Salk inactivated vaccine 1 dose at 6 years of age                                                       |
| Second Booster dose | 1960-1984         | OPV: Sabin live attenuated vaccination, 1 dose in the second grade of school that is at age 7-8 years.       |
|                     | 1985-2006         | OPV: Sabin inactivated vaccine, in the 7th grade that is age 12-13 years                                     |
|                     | 2007-till today   | IPV: Salk inactivated vaccine 1 dose at the age of 13                                                        |

Note = Poliomyelitis vaccination was and is part of the compulsory vaccination of children in the Slovak Republic

\* IPV = Inactivated vaccine

\*\* OPV = Oral live attenuated vaccine
